# Supplementary material
Source: PubMed Central journal article supplement (PMC2048784)
Supplement: plntphys_pp.107.101980_1.pdf [file plntphys_pp.107.101980_1.pdf]

A

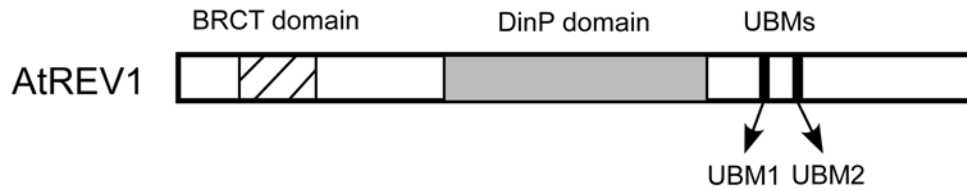

B

|              |             |      |                                                              |      |
|--------------|-------------|------|--------------------------------------------------------------|------|
| <b>UBM1:</b> | Arabidopsis | 800  | -PPMCYLDMEVLEN <b>LP</b> PELLSELDGTYGGKL-                    | 829  |
|              | rice        | 813  | -PPLSELDLEVLK <b>NP</b> PEIIYEMNDMYKGEL-                     | 842  |
|              | Human       | 813  | -PSPSQLDQSVLEA <b>LP</b> PDLREQVEQVCAVQQ-                    | 942  |
|              | Mouse       | 933  | -PSPSQIDQSVLEA <b>LP</b> LDLREQIEQVCAAQQ-                    | 962  |
|              | Chicken     | 943  | -PSASQLDKSVLEA <b>LP</b> PDLREQVEQIYTIQQ-                    | 972  |
|              | Yeast       | 750  | -PFKTIVTNRAFEA <b>LP</b> EDVKNDINNEFEKRN-                    | 779  |
|              |             |      | * . . . . . ** . . . . .                                     |      |
| <b>UBM2:</b> | Arabidopsis | 906  | -SSLSQVDVSVLQ <b>EL</b> PEELRADVLGAFPSHR-                    | 935  |
|              | rice        | 937  | -NSLSQADVTVLQ <b>EL</b> PEDVKADLFNALPLHR-                    | 966  |
|              | Human       | 937  | -PAFSQVDPEVF <b>AA</b> LP <b>AEL</b> QRELKAAYDQRQ-           | 966  |
|              | Mouse       | 1011 | -PAFSQVDPDV <b>FAA</b> LP <b>AEL</b> QKELKAAYDQRQ-           | 1040 |
|              | Chicken     | 1021 | -PAFSQVDPEVF <b>FAA</b> LP <b>AEL</b> Q <b>AEL</b> KDAYDQRQ- | 1050 |
|              | Yeast       | 808  | -DLPSTMEEQ <b>FMNE</b> LP <b>TQ</b> IRAEVRHDLRIQK-           | 837  |
|              |             |      | * . . . . . ** . . . . .                                     |      |
